# Supplementary material for: Reproducibility and transferability of topological data: experimental charge density study of two modifications ofl-alanyl-l-tyrosyl-l-alanine
Source: Royal Society of Chemistry journal article supplement (doi:10.1039/b607744g), 2006-01-01
Supplement: b607744g.pdf [file b607744g.pdf]

Supplementary Material (ESI) for Organic and Biomolecular Chemistry  
 This journal is © The Royal Society of Chemistry 2006

Nonbonded valence shell charge concentrations in L-Ala-L-Tyr-L-Ala with

| ...Water (1) |                    |                      |            |                   |       |                        |
|--------------|--------------------|----------------------|------------|-------------------|-------|------------------------|
| Atom X       | $\rho(\mathbf{r})$ | $\nabla(\mathbf{r})$ | $r_{X-CP}$ | X'---X---CP       | Angle | CP---X-CP <sub>2</sub> |
| O(1)         | 6.41               | -126                 | 0.341      | C(2)---O(1)---CP  | 100   | 128                    |
| O(1)         | 6.54               | -141                 | 0.338      | C(2)---O(1)---CP  | 119   |                        |
| O(2)         | 6.61               | -141                 | 0.339      | C(4)---O(2)---CP  | 102   | 155                    |
| O(2)         | 6.42               | -133                 | 0.340      | C(4)---O(2)---CP  | 102   |                        |
| O(3)         | 6.63               | -127                 | 0.343      | C(6)---O(3)---CP  | 103   | 134                    |
| O(3)         | 6.79               | -145                 | 0.335      | C(6)---O(3)---CP  | 123   |                        |
| O(4)         | 6.93               | -157                 | 0.335      | C(6)---O(4)---CP  | 97    | 157                    |
| O(4)         | 7.38               | -188                 | 0.332      | C(6)---O(4)---CP  | 106   |                        |
| O(5)         | 7.22               | -185                 | 0.333      | C(24)---O(5)---CP | 103   | 157                    |
| O(5)         | 6.41               | -130                 | 0.341      | C(24)---O(5)---CP | 96    |                        |
| ...EtOH (2)  |                    |                      |            |                   |       |                        |
| O(1)         | 5.49               | -104                 | 0.352      | C(2)---O(1)---CP  | 109   | 98                     |
| O(1)         | 5.96               | -123                 | 0.346      | C(2)---O(1)---CP  | 112   |                        |
| O(2)         | 6.06               | -125                 | 0.345      | C(4)---O(2)---CP  | 99    | 158                    |
| O(2)         | 6.24               | -129                 | 0.345      | C(4)---O(2)---CP  | 95    |                        |
| O(3)         | 6.38               | -148                 | 0.343      | C(6)---O(3)---CP  | 125   | 107                    |
| O(3)         | 5.92               | -122                 | 0.346      | C(6)---O(3)---CP  | 124   |                        |
| O(4)         | 6.20               | -127                 | 0.344      | C(6)---O(4)---CP  | 75    | 175                    |
| O(4)         | 6.75               | -170                 | 0.339      | C(6)---O(4)---CP  | 104   |                        |
| O(5)         | 6.44               | -153                 | 0.341      | C(24)---O(5)---CP | 109   | 166                    |
| O(5)         | 6.56               | -159                 | 0.341      | C(24)---O(5)---CP | 84    |                        |

Units: eÅ<sup>-3</sup>, eÅ<sup>-5</sup>, Å, deg
